# Supplementary material for: Top dielectric induced ambipolarity in an n-channel dual-gated organic field effect transistor
Source: Royal Society of Chemistry journal article supplement (doi:10.1039/c9tc02912e), 2019-01-01
Supplement: c9tc02912e1.pdf [file c9tc02912e1.pdf]

# Top Dielectric Induced Ambipolarity in an n-channel dual-gated Organic Field Effect Transistor

*Kaushik Bairagi*<sup>a,\*</sup>, *Elisabetta Zuccatti*<sup>a</sup>, *Francesco Calavalle*<sup>a</sup>, *Sara Catalano*<sup>a</sup>,  
*Subir Parui*<sup>a,†</sup>, *Roger Llopis*<sup>a</sup>, *Frank Ortmann*<sup>b</sup>, *Fèlix Casanova*<sup>a,c</sup>, *Luis E. Hueso*<sup>a,c,\*</sup>

<sup>a</sup> CIC nanoGUNE, 20018 San Sebastian, Spain

<sup>b</sup> Center for Advancing Electronics Dresden and Dresden Center for Computational Materials Science, Technische Universität Dresden, 01062, Dresden, Germany

<sup>c</sup> IKERBASQUE, Basque Foundation for Science, 48013 Bilbao, Spain

† Present address: IMEC and K. U. Leuven, Leuven 3001, Belgium

\*E-mail: [k.bairagi@nanogune.eu](mailto:k.bairagi@nanogune.eu); [l.hueso@nanogune.eu](mailto:l.hueso@nanogune.eu)

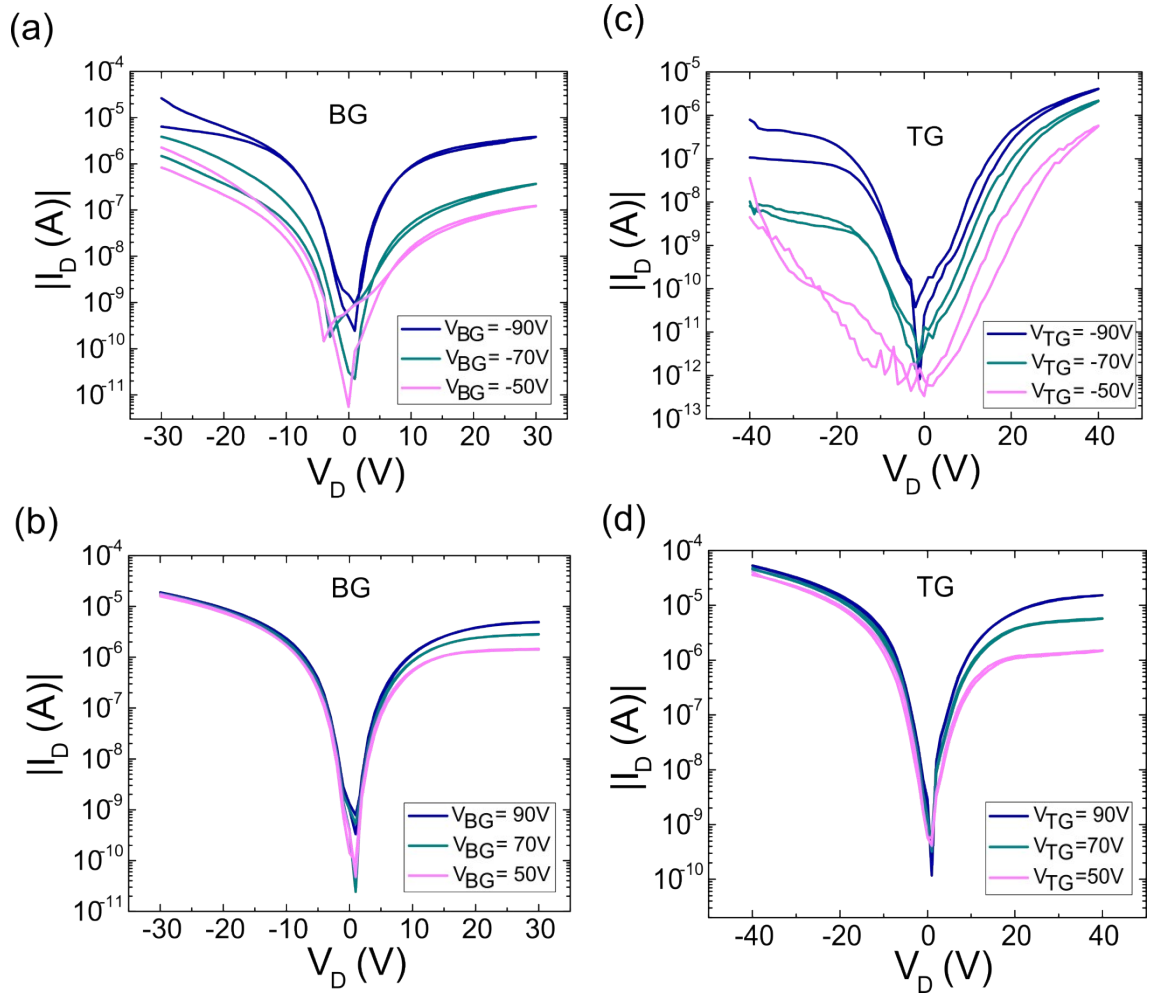

Figure S1. Trace-retrace drain characteristics ( $I_D - V_D$ ) of N2200 (36 nm) transistor when probed with respect to bottom gate (a) for p-type operation (b) for n-type operation and when probed with respect to top gate (c) for p-type operation (d) for n-type operation.

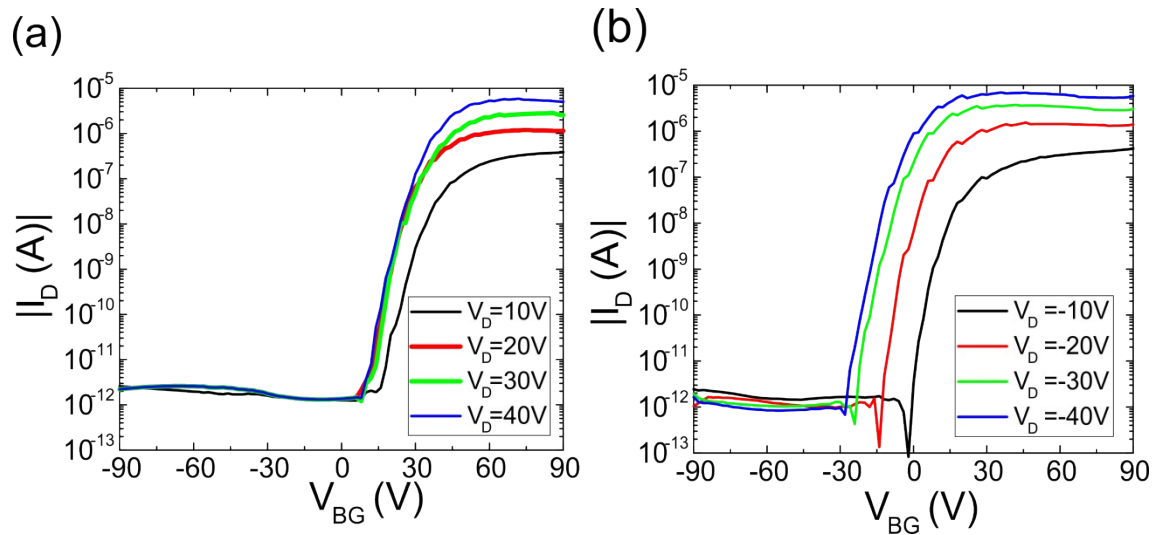

Figure S2. Transfer characteristics of N2200 (115 nm) (baked at 130°C for 1h 30 min) transistor ( $L=10 \mu\text{m}$ ,  $W = 10 \text{ nm}$ ) probed with respect to bottom gate (a) positive  $V_D$  (b) negative  $V_D$ .

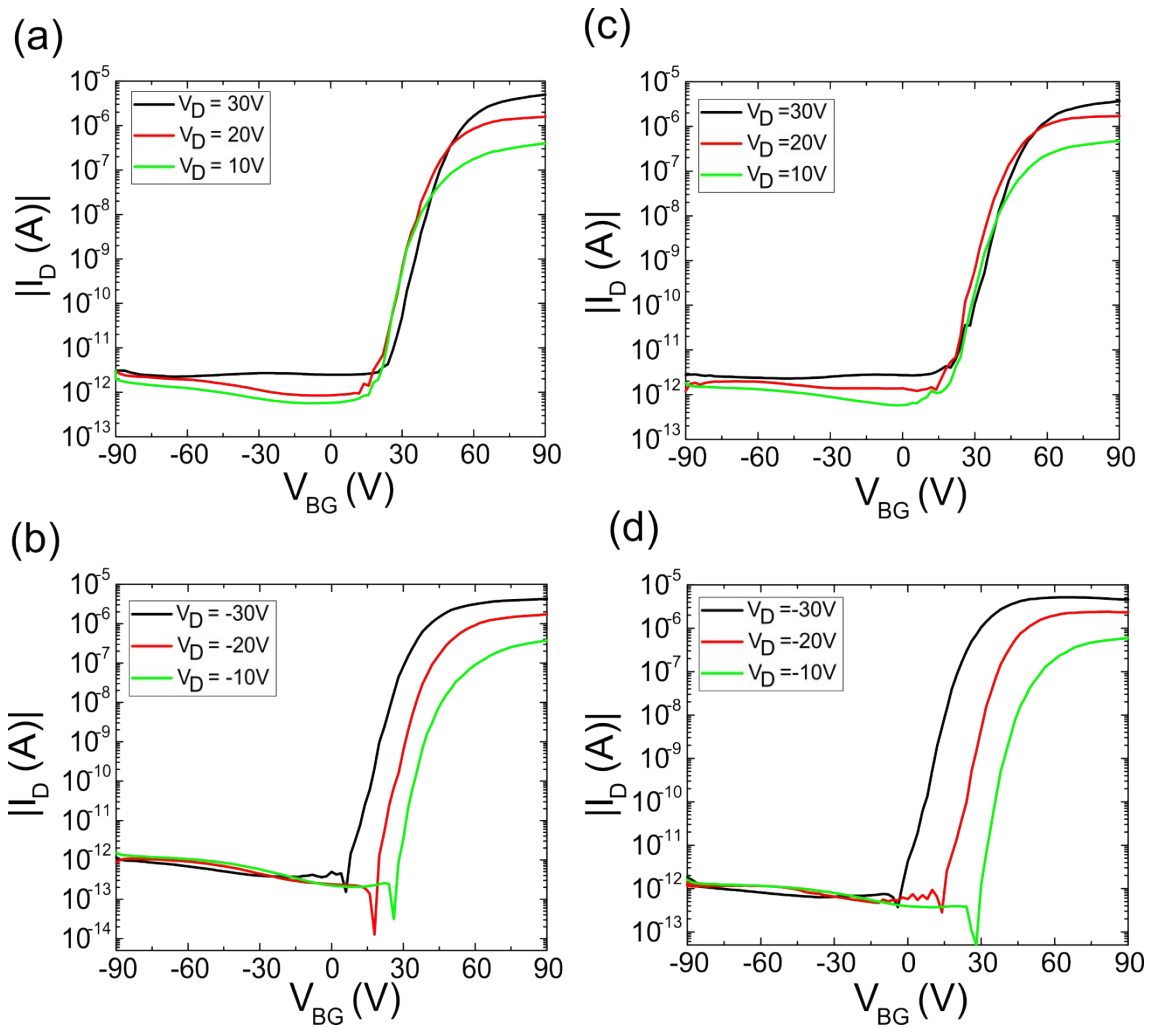

Figure S3. Transfer characteristics of anisole solvent (solvent for PMMA) coated N2200 (115 nm) transistor ( $L=10\ \mu\text{m}$ ,  $W = 10\ \mu\text{m}$ ) probed with respect to bottom gate (a)-(b) as spun anisole, (c)-(d) baking at  $180^\circ\text{C}$  for 2 min. after spin-coating of anisole.

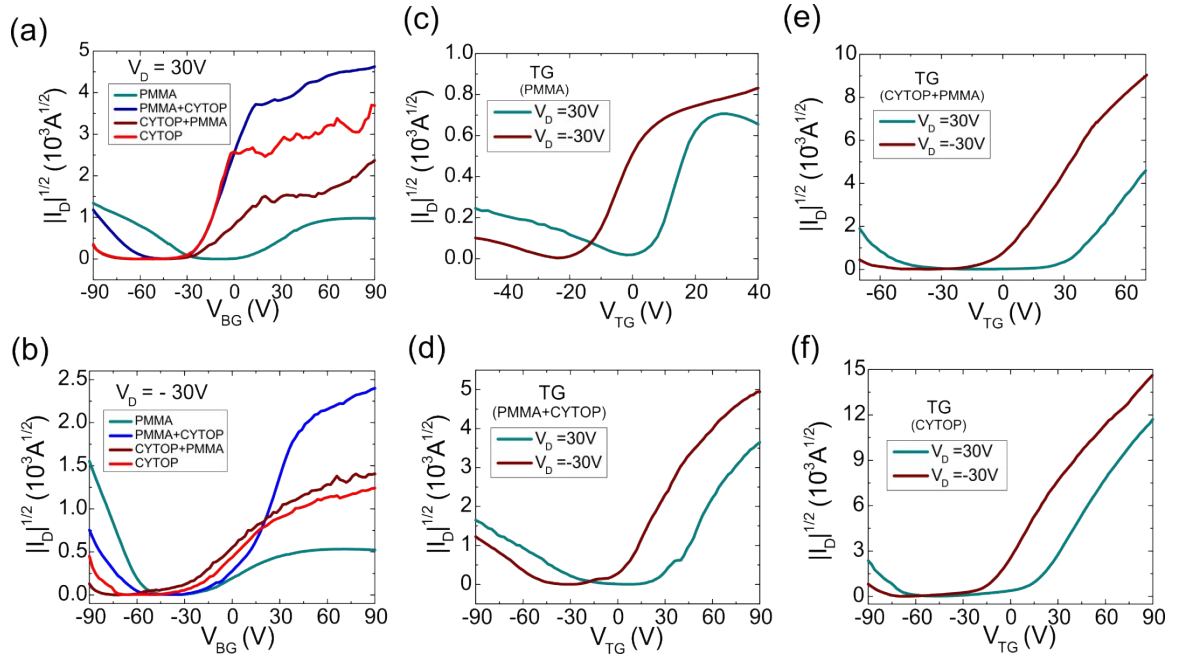

Figure S4.  $\sqrt{I_D}$  vs.  $V_G$  of N2200 (36 nm) transistor ( $L=10 \mu m$ ,  $W = 10 \mu m$ ) probed with respect to bottom gate having different top gate dielectrics with a drain bias  $V_D = 30V$  (a), with  $V_D = -30V$  (b). The same with respect to top gate with different top dielectrics, (c) PMMA, (d) PMMA+CYTOP, (e) CYTOP+PMMA and (f) CYTOP.

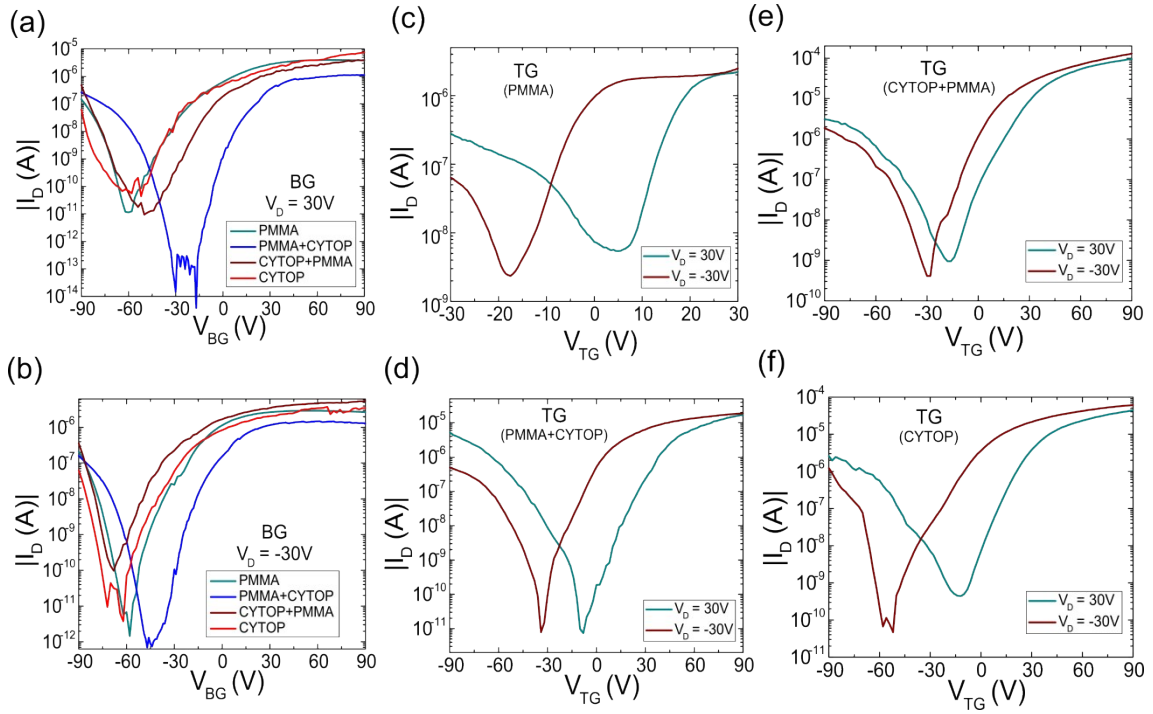

Figure S5. Transfer characteristics of N2200 (55 nm) transistor ( $L=10\ \mu\text{m}$ ,  $W = 10\ \text{nm}$ ) probed with respect to bottom gate having different top gate dielectrics with a drain bias  $V_D = 30\text{V}$  (a), with  $V_D = -30\text{V}$  (b). Transfer characteristics of the same transistors measured with respect to top gate with different top dielectrics, (c) PMMA, (d) PMMA+CYTOP, (e) CYTOP+PMMA and (f) CYTOP.

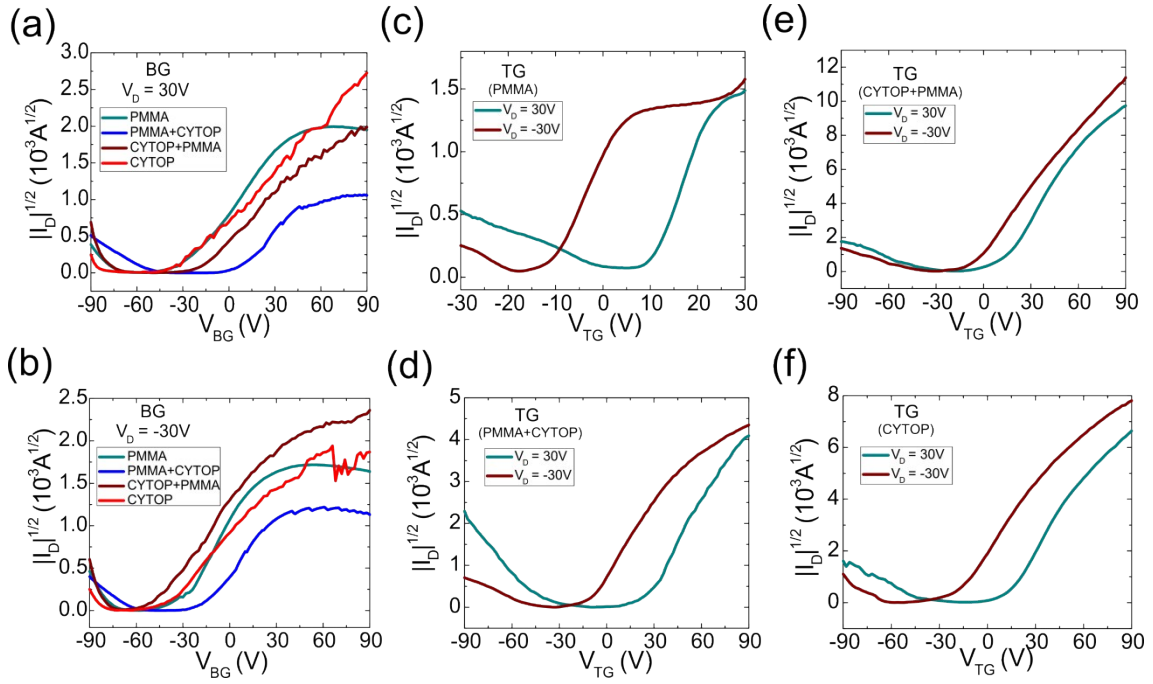

Figure S6.  $\sqrt{I_D}$  vs.  $V_G$  of N2200 (55 nm) transistor ( $L=10 \mu\text{m}$ ,  $W = 10 \text{mm}$ ) probed with respect to bottom gate having different top gate dielectrics with a drain bias  $V_D = 30\text{V}$  (a), with  $V_D = -30\text{V}$  (b). The same with respect to top gate with different top dielectrics, (c) PMMA, (d) PMMA+CYTOP, (e) CYTOP+PMMA and (f) CYTOP.

**Table S1a.** Mobilities and turn on voltages while OFET operating in BGBC mode (with 55 nm N2200) (L=10  $\mu\text{m}$ , W = 10 mm)

| Top dielectrics | p-channel                                                                    |              | n-channel                                                                    |              |
|-----------------|------------------------------------------------------------------------------|--------------|------------------------------------------------------------------------------|--------------|
|                 | $\mu_{h,BG}$ ( $\times 10^{-3} \text{ cm}^2 \text{ V}^{-1} \text{ s}^{-1}$ ) | $V_{on}$ (V) | $\mu_{e,BG}$ ( $\times 10^{-3} \text{ cm}^2 \text{ V}^{-1} \text{ s}^{-1}$ ) | $V_{on}$ (V) |
| PMMA            | 0.11                                                                         | -61.5        | 0.17                                                                         | -59.6        |
| PMMA+CYTOP      | 0.02                                                                         | -49.2        | 0.18                                                                         | -18.2        |
| CYTOP+PMMA      | 0.41                                                                         | -68.8        | 0.10                                                                         | -48.4        |
| CYTOP           | 0.08                                                                         | -72.1        | 0.11                                                                         | -52.4        |

**Table S1b.** Mobilities and turn on voltages while OFET operating in TGBC mode (with 55 nm N2200) (L=10  $\mu\text{m}$ , W = 10 mm)

| Top dielectrics | p-channel                                                                    |              | n-channel                                                                    |              |
|-----------------|------------------------------------------------------------------------------|--------------|------------------------------------------------------------------------------|--------------|
|                 | $\mu_{h,TG}$ ( $\times 10^{-3} \text{ cm}^2 \text{ V}^{-1} \text{ s}^{-1}$ ) | $V_{on}$ (V) | $\mu_{e,TG}$ ( $\times 10^{-3} \text{ cm}^2 \text{ V}^{-1} \text{ s}^{-1}$ ) | $V_{on}$ (V) |
| PMMA            | 0.05                                                                         | -18.4        | 1.8                                                                          | 5.6          |
| PMMA+CYTOP      | 0.39                                                                         | -34.3        | 5.36                                                                         | -8.2         |
| CYTOP+PMMA      | 0.65                                                                         | -29.5        | 14.40                                                                        | -16.5        |
| CYTOP           | 1.40                                                                         | -58.1        | 5.52                                                                         | -11.4        |



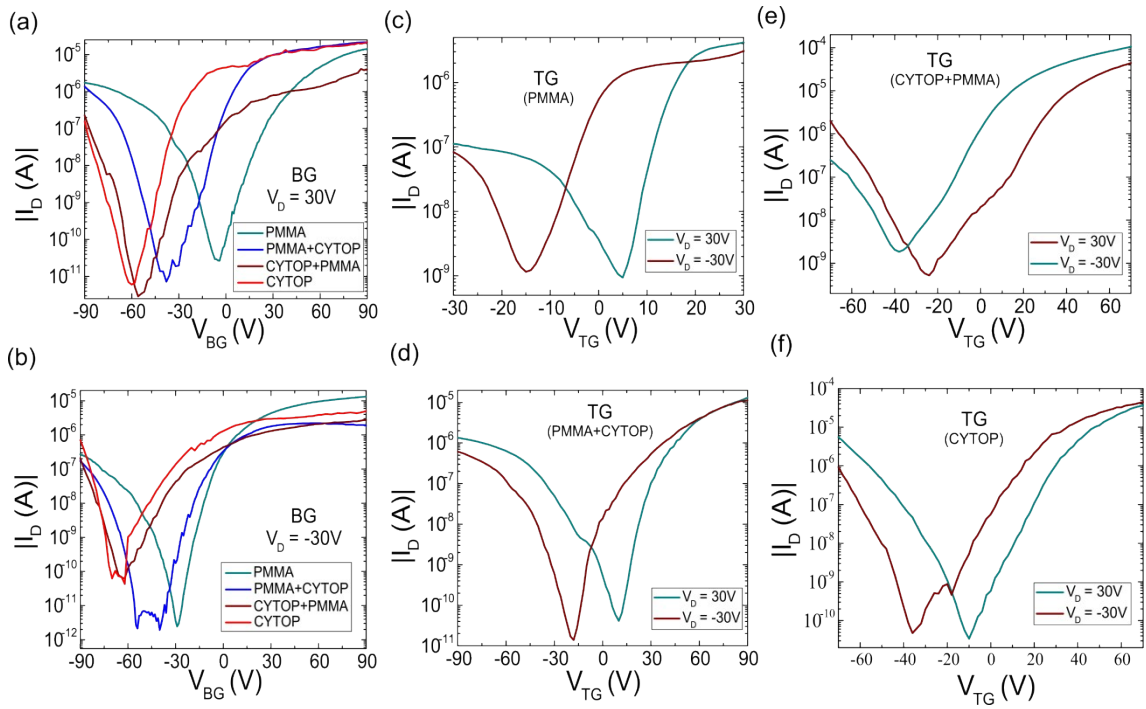

Figure S7. Transfer characteristics of N2200 (115 nm) transistor ( $L=10\ \mu\text{m}$ ,  $W = 10\ \text{nm}$ ) probed with respect to bottom gate having different top gate dielectrics with a drain bias  $V_D = 30\text{V}$  (a), with  $V_D = -30\text{V}$  (b). Transfer characteristics of the same transistors measured with respect to top gate with different top dielectrics, (c) PMMA, (d) PMMA+CYTOP, (e) CYTOP+PMMA and (f) CYTOP.

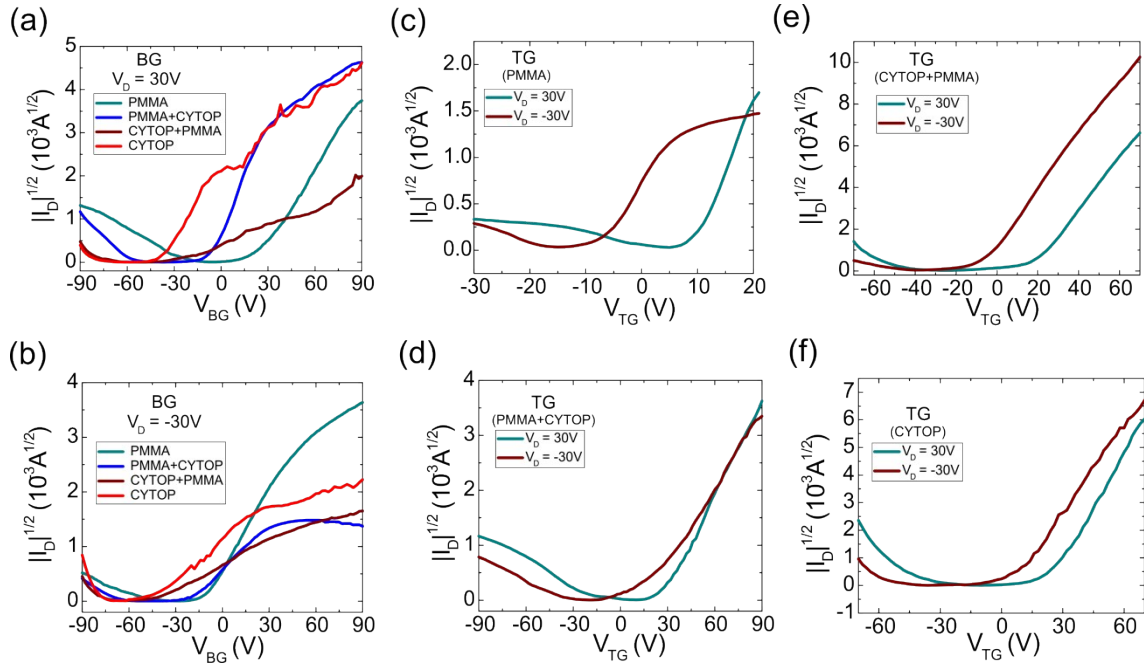

Figure S8.  $\sqrt{I_D}$  vs.  $V_G$  of N2200 (115 nm) transistor ( $L=10 \mu m$ ,  $W = 10 \mu m$ ) probed with respect to bottom gate having different top gate dielectrics with a drain bias  $V_D = 30V$  (a), with  $V_D = -30V$  (b). The same with respect to top gate with different top dielectrics, (c) PMMA, (d) PMMA+CYTOP, (e) CYTOP+PMMA and (f) CYTOP.

**Table S2a.** Mobilities and turn on voltages while OFET operating in BGBC mode (with 115 nm N2200) (L=10  $\mu\text{m}$ , W = 10 mm)

| Top dielectrics | p-channel                                                                    |              | n-channel                                                                    |              |
|-----------------|------------------------------------------------------------------------------|--------------|------------------------------------------------------------------------------|--------------|
|                 | $\mu_{h,BG}$ ( $\times 10^{-3} \text{ cm}^2 \text{ V}^{-1} \text{ s}^{-1}$ ) | $V_{on}$ (V) | $\mu_{e,BG}$ ( $\times 10^{-3} \text{ cm}^2 \text{ V}^{-1} \text{ s}^{-1}$ ) | $V_{on}$ (V) |
| PMMA            | 0.03                                                                         | -28.7        | 0.59                                                                         | -4.8         |
| PMMA+CYTOP      | 0.03                                                                         | -53.8        | 1.15                                                                         | -38.2        |
| CYTOP+PMMA      | 0.17                                                                         | -64.3        | 0.04                                                                         | -55.1        |
| CYTOP           | 0.79                                                                         | -70.2        | 0.58                                                                         | -59.6        |

**Table S2b.** Mobilities and turn on voltages while OFET operating in TGBC mode (with 115 nm N2200) (L=10  $\mu\text{m}$ , W = 10 mm)

| Top dielectrics | p-channel                                                                    |              | n-channel                                                                    |              |
|-----------------|------------------------------------------------------------------------------|--------------|------------------------------------------------------------------------------|--------------|
|                 | $\mu_{h,TG}$ ( $\times 10^{-3} \text{ cm}^2 \text{ V}^{-1} \text{ s}^{-1}$ ) | $V_{on}$ (V) | $\mu_{e,TG}$ ( $\times 10^{-3} \text{ cm}^2 \text{ V}^{-1} \text{ s}^{-1}$ ) | $V_{on}$ (V) |
| PMMA            | 0.02                                                                         | -15.5        | 3.13                                                                         | 4.8          |
| PMMA+CYTOP      | 0.10                                                                         | -18.5        | 2.44                                                                         | 10.2         |
| CYTOP+PMMA      | 0.21                                                                         | -38.3        | 10.75                                                                        | -24.2        |
| CYTOP           | 1.87                                                                         | -36.4        | 8.11                                                                         | -10.2        |

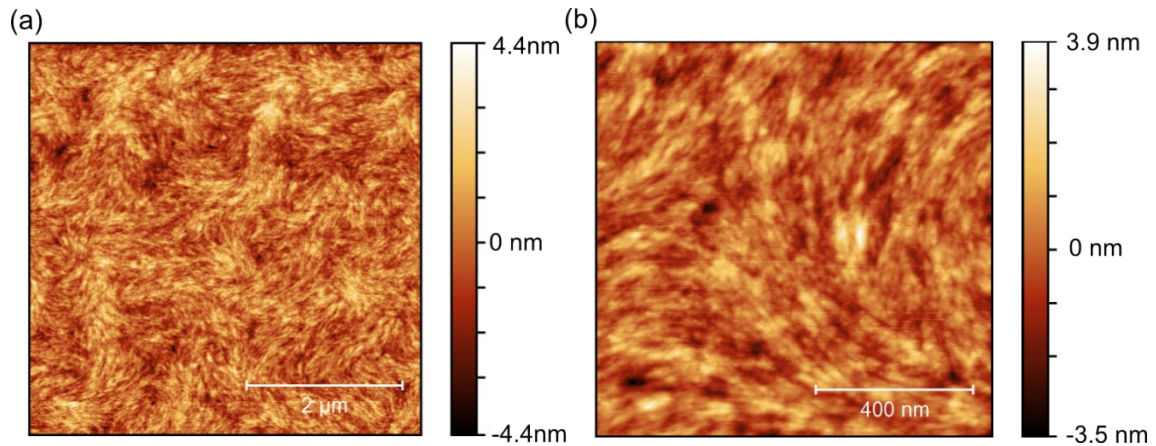

Figure S9. AFM images of N2200 film on  $\text{Si}^{n++}/\text{SiO}_2$ . The nodular like morphology is observed which is the characteristic growth process of this type of polymer by spin-coating. The RMS roughnesses are 0.9 nm and 0.8 nm for (a) and (b) respectively.

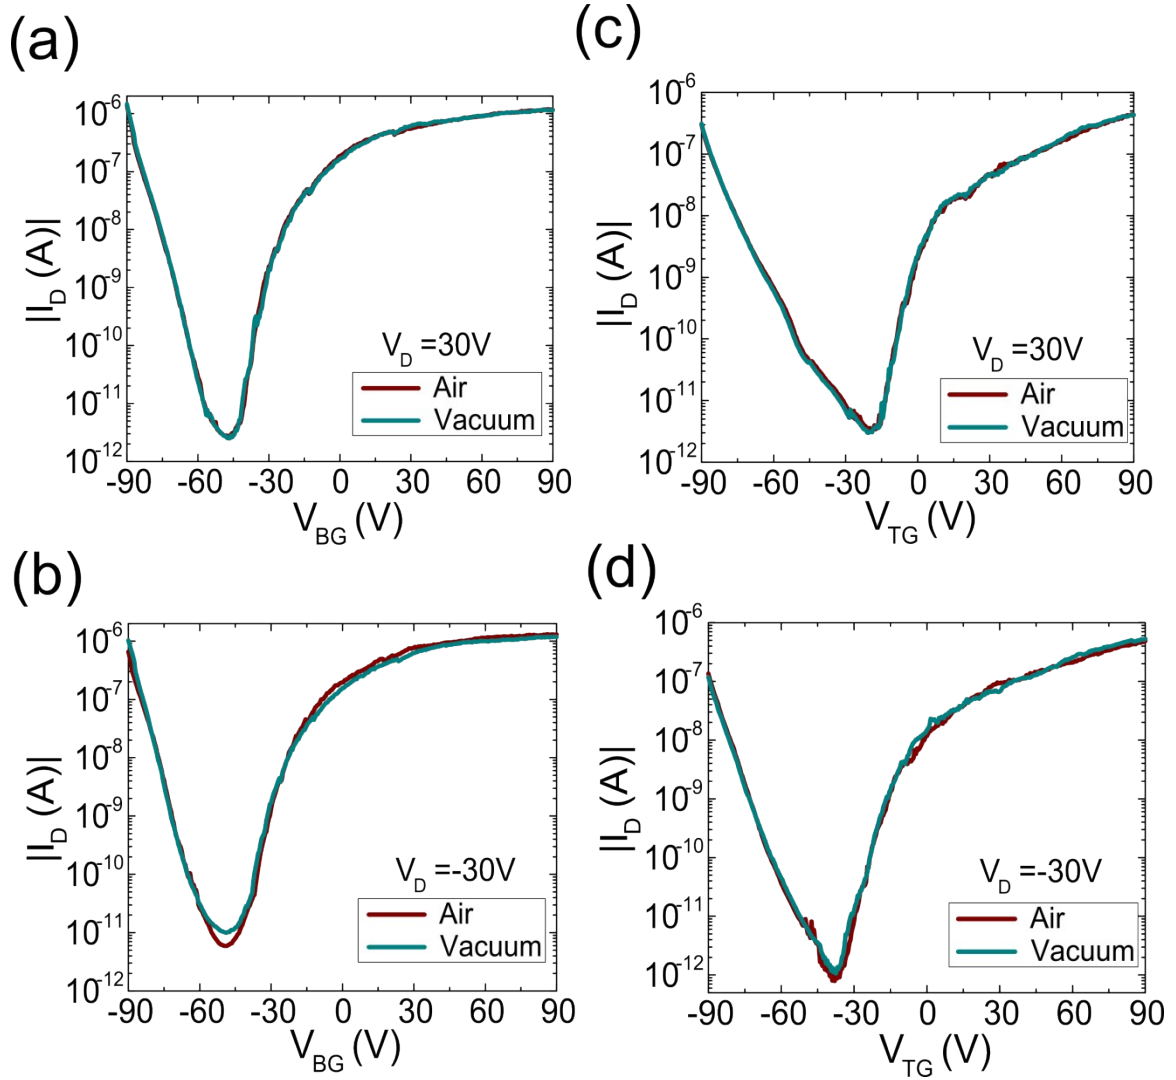

Figure S10. Air stability of dual gated N2200 transistor. Transfer characteristics of a N2200 (115 nm) transistor ( $L=10\ \mu\text{m}$ ,  $W = 10\ \text{mm}$ ) with PMMA+CYTOP as top gate dielectric measured in air and vacuum after 312 days of sample fabrication (sample was stored in a nitrogen filled box). Sample probed with respect to bottom gate (a) for  $V_D = 30\text{V}$ , (b) for  $V_D = -30\text{V}$ , probed with respect to top gate (c) for  $V_D = 30\text{V}$ , (d) for  $V_D = -30\text{V}$ .
